# Supplementary material for: Florida manatees Trichechus manatus latirostris actively consume the sponge Chondrilla caribensis
Source: PeerJ. 2020 Jan 22;8:e8443. doi: 10.7717/peerj.8443 (PMC6982412; doi:10.7717/peerj.8443)
Supplement: Supplemental Information 1 [file peerj-08-8443-s001.xlsx]

## Sheet: Sheet1
	ug chla/gww	ug chla/gdw		Data in text:	dry and wet weights		of Chondrilla
1	1.801	11.96
2	7.148	38.5
3	3.781	29.91
4	11.822	67.58
5	36.975	154.89
6	25.113	163.78
7	27.757	163.75
8	40.102	232.71
mean	19.3124	107.885
s.d.	15.1237	80.8494
95%CI	12.1013	64.6918
Fig. 3A - % of Chondrilla eaten by manatees
Pylons	South	East	North	West	% eaten
1	18.8	3.8	5.2	16.9
2	20.6	8.3	16.7	19.4
3	7.1	16.7	12.7	15.8
4	9.2	19.4	7.1	12.5
5	0	2.1	19.6	10.8
6	1.9	2.3	4.2	2.3
7	19.6	4.2	4.6	20.4
8	0	0	0	0
9	0	0	0	0
10	12.1	18.3	3.8	8.9
11	8.8	2.1	19.4	11.7	All
mean	8.91818	7.01818	8.48182	10.7909	8.80227
s.d.	8.05975	7.50611	7.34872	7.35642	7.43031
Fig. 3B - Chlorophyll in Chondrilla (ug gww/cm2)
	South	East	North	West	ug gww/cm2
1	52	39.71	21.6	31.8
2	44.4	41.9	34.9	29.1
3	48.1	43.2	103	49.6
4	55.2	60.1	31.7	20.6
5	10	21.56	62.4	53.3
6	76.4	59.49	36.9	34.3
7	55.2	83.97	52.1	50
8	58.6	18.56	54	41.7
9	6.7	30.93	30.4	61.9
10	39.64	46.61	28	43.5
11	38.94	55.83	129.9	62.4	All
mean	44.1073	45.6236	53.1727	43.4727	46.5941
s.d.	20.4611	18.8667	34.1551	13.5196	22.5683
